# Supplementary material for: Bone Marrow Stromal Cell Regeneration Profile in Treated B-Cell Precursor Acute Lymphoblastic Leukemia Patients: Association with MRD Status and Patient Outcome
Source: MDPI journal article supplement (doi:10.3390/cancers14133088), 2022-06-23
Supplement: s1 [file s1]

**Table S1.** Distribution of MSC and EC in normal and both childhood and adult BCP-ALL bone marrow (BM) according to the BM MRD status at day +15, day +33, and day +78 after starting therapy.

| Samples                       |                                                                 | % BM Stromal Cells<br>From BM Cells | % Mesenchymal Cells<br>From BM Stromal Cells | % Endothelial Cells<br>From BM Stromal Cells | % Blast Cells     |
|-------------------------------|-----------------------------------------------------------------|-------------------------------------|----------------------------------------------|----------------------------------------------|-------------------|
| <b>Normal/Reactive Donors</b> |                                                                 |                                     |                                              |                                              |                   |
| Children (n = 10)             |                                                                 | 0.064 (0.014–0.087)                 | 80 (71–96)                                   | 20 (4–29)                                    | -                 |
| Adults (n = 6)                |                                                                 | 0.014 (0.005–0.037)                 | 81 (75–90)                                   | 20 (10–25)                                   | -                 |
| <b>p-value *</b>              |                                                                 | <b>0.011</b>                        | 0.875                                        | 0.875                                        | -                 |
| <b>BCP-ALL</b>                |                                                                 |                                     |                                              |                                              |                   |
| <b>Day +15 after therapy</b>  |                                                                 |                                     |                                              |                                              |                   |
| Children                      | MRD <sup>+</sup> (n = 281 <sup>Δ</sup> , n = 226 <sup>♥</sup> ) | 0.028 (0–1.57)                      | 77 (13–99)                                   | 23 (1–87)                                    | 0.620 (0.0002–84) |
|                               | MRD <sup>-</sup> (n = 28 <sup>Δ</sup> , n = 21 <sup>♥</sup> )   | 0.032 (0–0.40)                      | 74 (30–93)                                   | 26 (7–70)                                    | 0                 |
| <b>p-value *</b>              |                                                                 | 0.929                               | 0.437                                        | 0.436                                        | <b>&lt;0.001</b>  |
| Adults                        | MRD <sup>+</sup> (n = 37 <sup>Δ</sup> , n = 32 <sup>♥</sup> )   | 0.030 (0–0.95)                      | 73 (15–100)                                  | 27 (0–85)                                    | 2.000 (0.01–91)   |
|                               | MRD <sup>-</sup> (n = 4 <sup>Δ</sup> , n = 3 <sup>♥</sup> )     | 0.330 (0–0.57)                      | 94 (77–96)                                   | 6 (4–23)                                     | 0                 |
| <b>p-value *</b>              |                                                                 | 0.146                               | 0.125                                        | 0.125                                        | <b>&lt;0.001</b>  |
| <b>Day +33 after therapy</b>  |                                                                 |                                     |                                              |                                              |                   |
| Children                      | MRD <sup>+</sup> (n = 164 <sup>Δ</sup> , n = 158 <sup>♥</sup> ) | 0.051 (0–1.85)                      | 76 (49–98)                                   | 24 (2–51)                                    | 0.018 (0.0002–56) |
|                               | MRD <sup>-</sup> (n = 118 <sup>Δ</sup> , n = 108 <sup>♥</sup> ) | 0.045 (0–1.52)                      | 76 (38–97)                                   | 24 (3–62)                                    | 0                 |
| <b>p-value *</b>              |                                                                 | 0.417                               | 0.226                                        | 0.229                                        | <b>&lt;0.001</b>  |
| Adults                        | MRD <sup>+</sup> (n = 33 <sup>Δ</sup> , n = 29 <sup>♥</sup> )   | 0.039 (0–0.3)                       | 67 (0–94)                                    | 33 (6–100)                                   | 0.050 (0.002–69)  |
|                               | MRD <sup>-</sup> (n = 33 <sup>Δ</sup> , n = 28 <sup>♥</sup> )   | 0.020 (0–1.11)                      | 76 (28–100)                                  | 24 (0–72)                                    | 0                 |
| <b>p-value *</b>              |                                                                 | 0.546                               | 0.076                                        | 0.076                                        | <b>&lt;0.001</b>  |
| <b>Day +78 after therapy</b>  |                                                                 |                                     |                                              |                                              |                   |
| Children                      | MRD <sup>+</sup> (n = 25 <sup>Δ</sup> , n = 25 <sup>♥</sup> )   | 0.120 (0.005–0.83)                  | 76 (40–95)                                   | 24 (5–60)                                    | 0.021 (0.0006–11) |
|                               | MRD <sup>-</sup> (n = 208 <sup>Δ</sup> , n = 203 <sup>♥</sup> ) | 0.061 (0–1.22)                      | 76 (51–94)                                   | 24 (6–49)                                    | 0                 |
| <b>p-value *</b>              |                                                                 | 0.351                               | 0.110                                        | 0.110                                        | <b>&lt;0.001</b>  |
| Adults                        | MRD <sup>+</sup> (n = 16 <sup>Δ</sup> , n = 15 <sup>♥</sup> )   | 0.024 (0–0.63)                      | 76 (38–98)                                   | 24 (2–62)                                    | 0.054 (0.0015–63) |
|                               | MRD <sup>-</sup> (n = 28 <sup>Δ</sup> , n = 27 <sup>♥</sup> )   | 0.050 (0–0.4)                       | 76 (48–96)                                   | 24 (4–52)                                    | 0                 |
| <b>p-value *</b>              |                                                                 | 0.583                               | 0.733                                        | 0.733                                        | <b>&lt;0.001</b>  |

Abbreviations: BM: bone marrow; BCP-ALL: B-cell precursor acute lymphoblastic leukemia; ND: not detected; <sup>Δ</sup>Total number of samples analyzed; <sup>♥</sup>Number of samples in which stromal cells were present; \* Kruskal–Wallis test.

**Table S2.** Univariate and multivariate analysis of prognostic factors for disease-free survival (DFS) of patients included in the discovery cohort of childhood BCP-ALL (n = 116).

|                              | Univariate Analysis |       |               |              | Multivariate Analysis |             |              |
|------------------------------|---------------------|-------|---------------|--------------|-----------------------|-------------|--------------|
|                              | Median DFS (Years)  | HR    | 95th CI       | p-Value      | HR                    | 95th CI     | p-Value      |
| <b>Age at diagnosis</b>      |                     |       |               |              |                       |             |              |
| ≥ 1 to <10 years             | 5.60                | 1     |               |              |                       |             |              |
| <1 or ≥ 10 years             | 4.67                | 2.62  | (1.14–6.03)   | <b>0.024</b> |                       |             |              |
| <b>Gender</b>                | 5.27                | 1     |               |              |                       |             |              |
| Female                       |                     |       |               |              |                       |             |              |
| Male                         | 5.63                | 1.34  | (0.64–3.22)   | 0.383        |                       |             |              |
| <b>WBC at diagnosis</b>      | 5.88                | 1     |               |              |                       |             |              |
| ≤ 50 × 10 <sup>9</sup> /L    |                     |       |               |              |                       |             |              |
| >50 × 10 <sup>9</sup> /L     | 4.69                | 1.45  | (0.54–3.87)   | 0.461        |                       |             |              |
| <b>PB Blasts at Day +8</b>   | 5.95                | 1     |               |              |                       |             |              |
| < 1 × 10 <sup>9</sup> /L     |                     |       |               |              |                       |             |              |
| ≥1 × 10 <sup>9</sup> /L      | 4.45                | 1.40  | (0.90–2.16)   | 0.134        |                       |             |              |
| <b>Genetic Abnormalities</b> | 5.95                | 1     |               |              |                       |             |              |
| Favorable                    |                     |       |               |              |                       |             |              |
| Adverse                      | 3.01                | 3.30  | (1.02–10.65)  | <b>0.046</b> |                       |             |              |
| <b>Follow-up MRD:</b>        |                     |       |               |              |                       |             |              |
| <b>Day +15</b>               |                     |       |               |              |                       |             |              |
| MRD <sup>-</sup>             | ND *                | 1     |               |              |                       |             |              |
| MRD <sup>+</sup>             | 5.76                | 23.21 | (0.04–13.355) | 0.332        |                       |             |              |
| <b>Day +33</b>               | 5.88                | 1     |               |              |                       |             |              |
| MRD <sup>-</sup>             |                     |       |               |              |                       |             |              |
| MRD <sup>+</sup>             | 5.40                | 2.62  | (1.04–6.60)   | <b>0.041</b> |                       |             |              |
| <b>Day +78</b>               |                     |       |               |              | 1                     |             |              |
| MRD <sup>-</sup>             | 5.92                | 1     |               |              |                       |             |              |
| MRD <sup>+</sup>             | 3.30                | 3.32  | (1.13–9.73)   | <b>0.029</b> | 3.28                  | (1.12–9.66) | <b>0.031</b> |
| <b>% Stromal cells:</b>      |                     |       |               |              |                       |             |              |
| <b>Day +15</b>               |                     |       |               |              |                       |             |              |
| ≤ 0.21%                      | 5.78                | 1     |               |              |                       |             |              |
| >0.21%                       | ND *                | 0.44  | (0–51.9)      | 0.387        |                       |             |              |
| <b>Day +33</b>               | 6.02                | 1     |               |              |                       |             |              |
| ≤ 0.21%                      |                     |       |               |              |                       |             |              |
| >0.21%                       | 3.85                | 3.04  | (1.20–7.70)   | <b>0.019</b> |                       |             |              |
|                              | 5.92                | 1     |               |              |                       |             |              |

|                                        |      |      |              |              |      |          |             |
|----------------------------------------|------|------|--------------|--------------|------|----------|-------------|
| <b>Day +78</b>                         |      |      |              |              |      |          |             |
| ≤ 0.21%                                |      |      |              |              |      |          |             |
| >0.21%                                 | 4.52 | 1.96 | (0.79–4.90)  | 0.150        |      |          |             |
| <b>% Mesenchymal cells:</b>            |      |      |              |              |      |          |             |
| <b>Day +15</b>                         |      |      |              |              |      |          |             |
| ≤ 73%                                  | 5.53 | 1    |              |              |      |          |             |
| >73%                                   | 5.71 | 0.49 | (0.21–1.17)  | 1.060        |      |          |             |
| <b>Day +33</b>                         |      |      |              |              |      |          |             |
| ≤ 73%                                  | 4.81 | 1    |              |              |      |          |             |
| >73%                                   | 6.13 | 0.56 | (0.25–1.25)  | 0.555        |      |          |             |
| <b>Day +78</b>                         |      |      |              |              |      |          |             |
| ≤ 73%                                  | 4.99 | 1    |              |              |      |          |             |
| >73%                                   | 6.06 | 0.55 | (0.26–1.20)  | 0.134        |      |          |             |
| <b>% Endothelial cells (EC):</b>       |      |      |              |              |      |          |             |
| <b>Day +15</b>                         |      |      |              |              |      |          |             |
| EC ≤ 32%                               | 5.53 | 1    |              |              |      |          |             |
| EC > 32%                               | 5.44 | 1.71 | (0.72–4.06)  | 0.226        |      |          |             |
| <b>Day +33</b>                         |      |      |              |              |      |          |             |
| EC ≤ 32%                               | 5.93 | 1    |              |              |      |          |             |
| EC > 32%                               | 5.00 | 1.27 | (0.53–3.07)  | 0.593        |      |          |             |
| <b>Day +78</b>                         |      |      |              |              |      |          |             |
| EC ≤ 32%                               | 6.01 | 1    |              |              | 1    |          |             |
| EC > 32%                               | 3.97 | 2.27 | (1.01–5.10)  | <b>0.048</b> | 2.50 | (1–9.66) | <b>0.05</b> |
| <b>MRD Status and % EC at Day +78:</b> |      |      |              |              |      |          |             |
| MRD <sup>-</sup> and EC ≤ 32%          | 6.09 | 1    |              |              |      |          |             |
| MRD <sup>+</sup> or EC ≤ 32%           |      |      |              | <b>0.001</b> |      |          |             |
| MRD <sup>-</sup> or EC > 32%           | 4.13 | 2.12 | (0.92–4.86)  |              |      |          |             |
| MRD <sup>+</sup> and EC > 32%          | 1.56 | 9.63 | (2.14–43.32) |              |      |          |             |

CI: confidence interval; HR: hazard ratio; ND: not determined; MRD: minimal residual disease \* there were no events in this group.

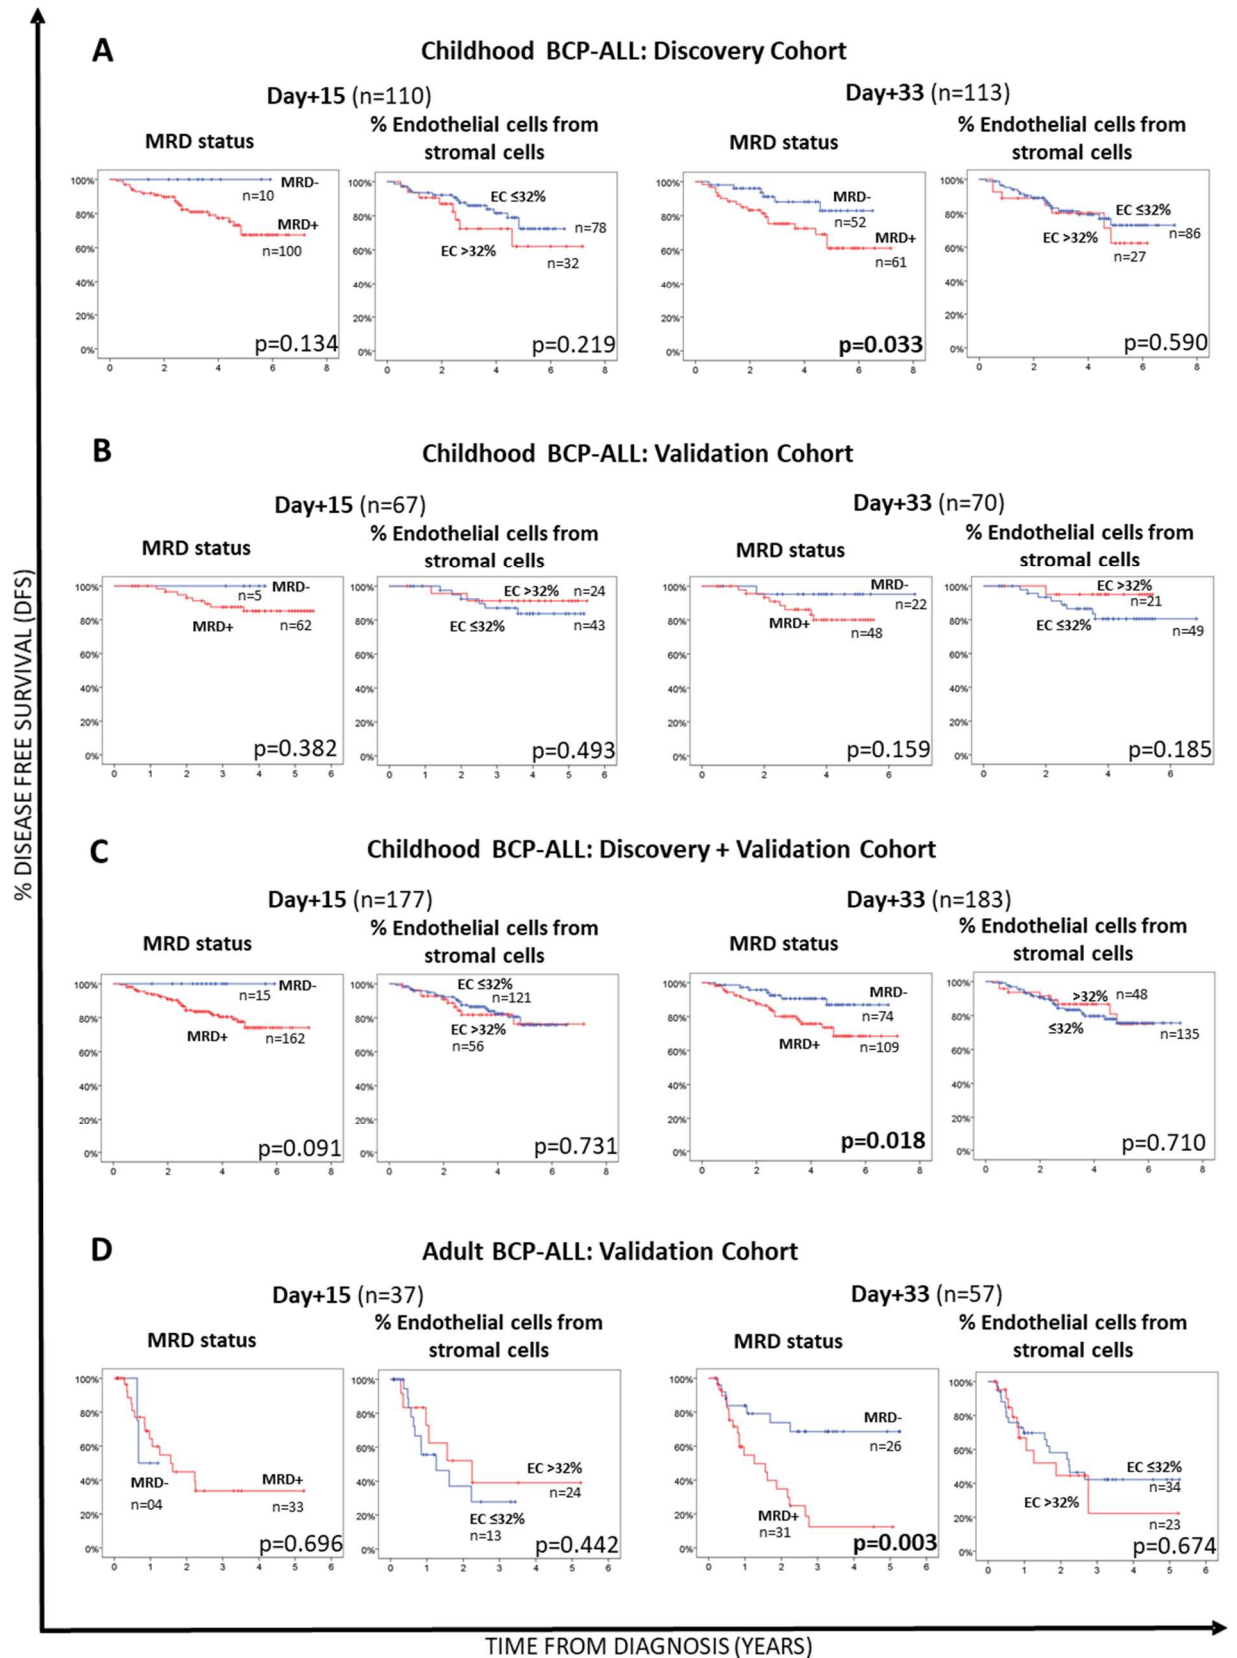

**Figure S1.** Impact of the BM MRD status and the percentage of BM endothelial cells within the whole BM stromal cell compartment Panels (A–C) at day +15 and day +33 of therapy on disease free survival (DFS) of childhood BCP-ALL Panel. (A) Discovery cohort; (B) validation cohort; (C) discovery plus validation cohort); adult BCP-ALL Panel (D), respectively. Statistical significance was set at  $p < 0.05$  (log-rank test).

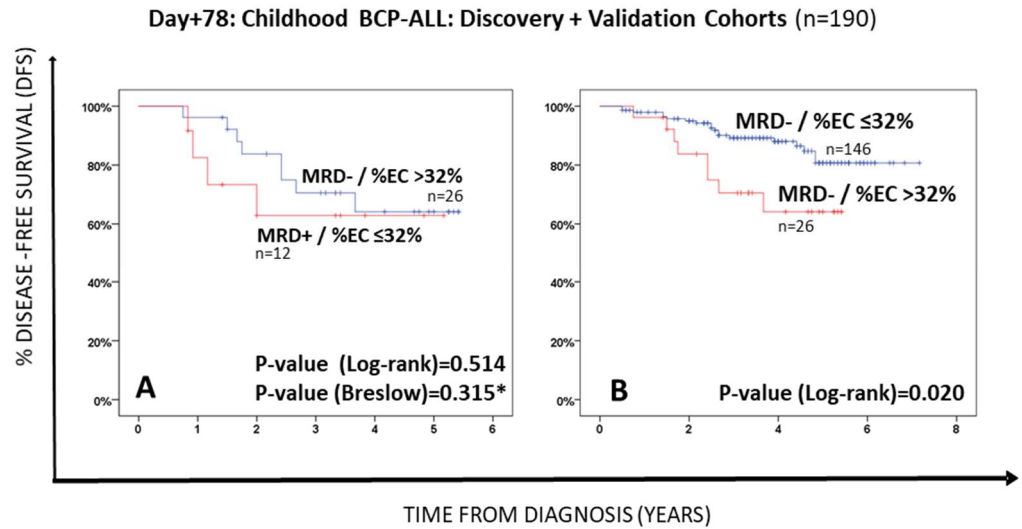

**Figure S2.** Impact of the bone marrow (BM) minimal residual disease (MRD) status and the percentage of BM endothelial cells (EC) within the whole BM stromal cell compartment at day +78 of therapy on disease-free survival (DFS) of childhood BCP-ALL for both the discovery plus validation cohorts: comparison between MRD<sup>-</sup> patients with >32% EC in BM vs. MRD<sup>+</sup> cases with ≤32% EC Panel (A), and among MRD<sup>-</sup> patients between cases with low (≤32%) vs high (>32%) percentages of EC within BM stromal cells Panel (B). Statistical significance was set at  $p < 0.05$  (log-rank test). \* Breslow test was used in Panel A to exclude a possible statically significant difference at the first part of the curve.
